# Supplementary material for: New insights into the effect of pH on the mechanism of ofloxacin electrochemical detection in aqueous solution
Source: Royal Society of Chemistry journal article supplement (doi:10.1039/c9cp03486b), 2019-01-01
Supplement: c9cp03486b1.pdf [file c9cp03486b1.pdf]

**New insights into the effect of pH on the mechanism of ofloxacin electrochemical detection in aqueous solution**

Ting Liu,<sup>a</sup> Qiang Xue,\*<sup>a</sup> Jianbo Jia,<sup>b</sup> Fei Liu,<sup>a</sup> Shengzhang Zou,<sup>cd</sup> Renshi Tang,<sup>e</sup> Tao Chen,<sup>a</sup>  
Jiawei Li,<sup>a</sup> and Yumin Qian \*<sup>f</sup>

<sup>a</sup> *Beijing Key Laboratory of Water Resources and Environmental Engineering, School of Water Resources and Environment, China University of Geosciences (Beijing), Beijing 100083, PR China*

<sup>b</sup> *The State Key Laboratory of Electroanalytical Chemistry, Changchun Institute of Applied Chemistry, Chinese Academy of Sciences, 5625 Renmin Street, Changchun, Jilin 130022, PR China*

<sup>c</sup> *Institute of Karst Geology, Chinese Academy of Geological Sciences, Guilin, Guangxi 541004, China*

<sup>d</sup> *Key Laboratory of Karst Dynamics of Ministry Land and Resources & Guangxi, Guilin 541004, China*

<sup>e</sup> *School of Food and Chemical Engineering, Beijing Technology and Business University, Beijing 100048, China*

<sup>f</sup> *Materials Science and Engineering Program and Department of Mechanical Engineering, The University of Texas at Austin, Austin, TX 78712, USA*

**\*Corresponding authors:**

E-mail: [xueqiang@cugb.edu.cn](mailto:xueqiang@cugb.edu.cn) ; [yuminqian@utexas.edu](mailto:yuminqian@utexas.edu)

### Supplementary Material 1

As shown in Figure S1 (a, b), the interface morphology of Gr/GCE was characterized using SEM. Our results indicated that the surface of the Gr/GCE featured a folded lamella structure, indicating that Gr was able to successfully modify the electrode surface to effectively increase its specific surface area.

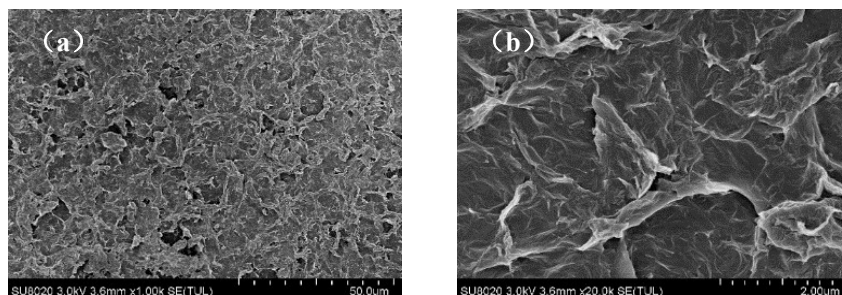

Figure S1. (a, b) Scanning electron microscopy images of a graphene-modified glassy carbon electrode (Gr/GCE).

### Supplementary Material 2

The electrochemical sensor is a device that produces sensing signal by the reaction between the electrode surface and the target substance, and then converts the sensing signal into an identifiable electric signal proportional to the concentration of the target substance through the transducer, so as to achieve qualitative or quantitative analysis and detection of the target substance. The schematic diagram of its working principle is shown in the following figure.

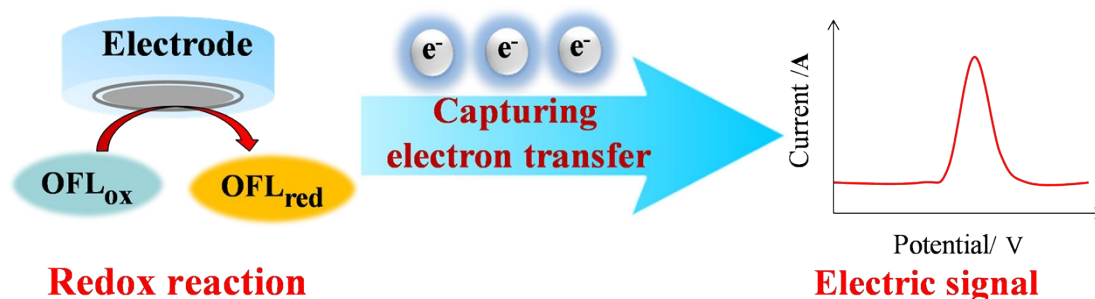

Figure S2 The schematic diagram of electrochemical sensor principle
